# Supplementary material for: Patterns of negative seroconversion in ongoing surveys of SARS-CoV-2 antibodies among workers in New York’s largest healthcare system
Source: HighWire-hosted journal article supplement (doi:10.1136/oemed-2021-107382), 2021-08-25
Supplement: oemed-2021-107382supp001_data_supplement.pdf [file oemed-2021-107382supp001_data_supplement.pdf]

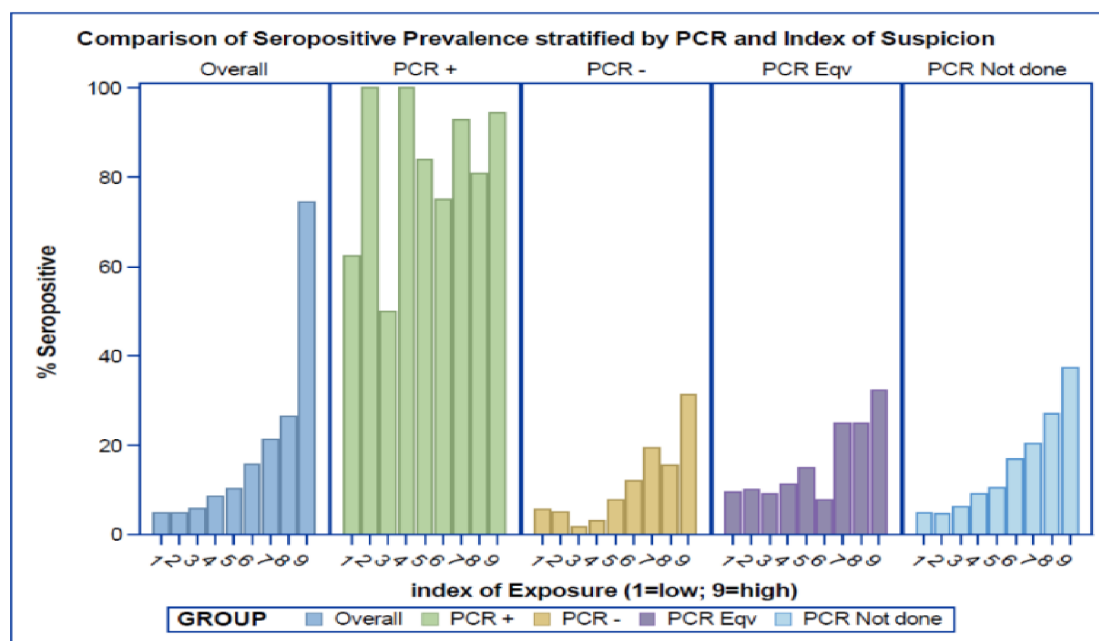

**Figure S1.** Baseline distribution of (Spring 2020, N=40329) Index of suspicion of exposure to SARS-CoV-2 (Do you believe you were infected with COVID-19? 1=low – 9=high) by PCR (reverse transcription polymerase chain reaction) PCR+ = PCR positive (n=2186); PCR- = PCR negative (n=3892); PCR Eqv = PCR equivocal (n=263)
