# Supplementary material for: Patterns of negative seroconversion in ongoing surveys of SARS-CoV-2 antibodies among workers in New York’s largest healthcare system
Source: HighWire-hosted journal article supplement (doi:10.1136/oemed-2021-107382), 2021-08-25
Supplement: oemed-2021-107382supp002_data_supplement.pdf [file oemed-2021-107382supp002_data_supplement.pdf]

**Table S1:** Assays used in the study of **Persistent SARS-CoV-2 antibodies in ongoing exposure surveys of workers in New York's largest healthcare system**

| Assay                                                                                                         | Method       | Antigen Target   | Sensitivity/Specificity                                                              | Participants in follow-up study<br>n=955 |
|---------------------------------------------------------------------------------------------------------------|--------------|------------------|--------------------------------------------------------------------------------------|------------------------------------------|
| Abbott Architect SARS-CoV-2 IgG                                                                               | CMIA         | Nucleocapsid (N) | 8-13 days: 91.18% (31/34)<br>>14 days: 100% (73/73)<br>99.63% (1066/1070)            | 39%                                      |
| Roche Elecsys Anti-SARS-CoV-2                                                                                 | ECLIA        | Nucleocapsid (N) | 7-13 days: 88.10% (52/59)<br>>14 days: 100% (29/29)<br>99.3% (5262/5272)             | 44%                                      |
| Ortho Clinical Diagnostics VITROS Anti-SARSCoV-2 IgG                                                          | Immunometric | Spike            | 87.5% (42/48)<br>100% (407/407)                                                      | 3%                                       |
| Ortho Clinical Diagnostics VITROS Immunodiagnostic Products Anti-SARS-CoV-2 Total Reagent Pack and Calibrator | Immunometric | Spike            | 83.3% (30/36)<br>100% (400/400)                                                      | 2%                                       |
| DiaSorin LIAISON SARS-CoV-2 S1/S2 IgG                                                                         | CLIA         | Spike            | S1 and S2 6-14 days: 89.80% (44/49)<br>>15 days: 97.56% (40/41)<br>99.3% (1082/1090) | 12%                                      |

In the September 2020 follow-up study, all assays used were United States FDA/EUA approved and employed at Northwell Health CLIA-certified Core Laboratory, a centralized laboratory opened in 2019 to serve all 23 facilities, urgent care centers, drive-through testing facilities, and outpatient practices.

Days refers to the number of days after symptom onset

n=number of participants

%=percent

N=nucleocapsid protein (vs spike protein S)

S1= subunit of the spike protein (binding), S2= subunit of the spike protein (mediating), S1/S2= spike protein cleavage site

SARS-CoV-2 = severe acute respiratory syndrome coronavirus 2

IgG = immunoglobulin G

CMIA = chemiluminescent magnetic microparticle immunoassay

ECLIA = electrochemiluminescence immunoassay analyzer

CLIA = Clinical Laboratory Improvement Amendments

FDA = Food and Drug Administration

EUA = Emergency Use Authorization

**Table S2:** Characteristics of those eligible previously seropositive healthcare workers without serology results

| Respondents to the survey questionnaire only* |                          |              |             | Non-respondents to the survey** |             |
|-----------------------------------------------|--------------------------|--------------|-------------|---------------------------------|-------------|
| CATEGORY                                      |                          | N=676        |             | N=2359                          |             |
|                                               |                          | n            | %           | n                               | %           |
| <b>Shift</b>                                  | Day                      | 175          | 25.9        | 772                             | 32.7        |
|                                               | Other                    | 462          | 68.3        | 1497                            | 63.5        |
|                                               | Missing                  | 39           | 5.8         | 90                              | 3.8         |
| <b>PCR</b>                                    | Negative                 | 46           | 6.8         | 170                             | 7.2         |
|                                               | Positive                 | 281          | 41.6        | 1034                            | 43.8        |
|                                               | Equivocal                | 7            | 1.0         | 17                              | 0.7         |
|                                               | No PCR test              | 342          | 50.6        | 1138                            | 48.2        |
| <b>Primary work location</b>                  | ED                       | 153          | 9.4         | 252                             | 10.7        |
|                                               | Hospital units (non-ICU) | 466          | 28.6        | 846                             | 35.9        |
|                                               | ICU                      | 88           | 5.4         | 164                             | 7.0         |
|                                               | Other                    | 909          | 55.7        | 1069                            | 45.3        |
|                                               | Missing                  | 15           | 0.9         | 28                              | 1.2         |
| <b>Race/Ethnicity</b>                         | Asian/Pacific Islander   | 237          | 14.5        | 297                             | 12.6        |
|                                               | Black                    | 221          | 13.5        | 723                             | 30.7        |
|                                               | Hispanic                 | 282          | 17.2        | 486                             | 20.6        |
|                                               | Two or more races        | 17           | 1.0         | 33                              | 1.4         |
|                                               | White                    | 803          | 49.2        | 722                             | 30.6        |
|                                               | American Indian          | 10           | 0.6         | 8                               | 0.3         |
|                                               | Non-specified or Missing | 61           | 3.7         | 90                              | 3.8         |
| <b>Gender</b>                                 | Female                   | 1262         | 77.4        | 1558                            | 66.0        |
|                                               | Male                     | 310          | 19.0        | 715                             | 30.3        |
|                                               | Missing                  | 59           | 3.6         | 86                              | 3.7         |
| <b>Re-infected/ill <sup>aa</sup></b>          | No                       | 1501         | 92.0        |                                 |             |
|                                               | Yes                      | 129          | 7.9         |                                 |             |
|                                               | Missing                  | 1            | 0.1         |                                 |             |
| <b>Recent travel <sup>b</sup></b>             | No                       | 1510         | 92.6        |                                 |             |
|                                               | Yes                      | 117          | 7.2         |                                 |             |
|                                               | Missing                  | 4            | 0.3         |                                 |             |
| <b>Public transport <sup>c</sup></b>          | No                       | 1440         | 88.3        |                                 |             |
|                                               | Yes                      | 184          | 11.3        |                                 |             |
|                                               | Missing                  | 7            | 0.4         |                                 |             |
|                                               |                          | Median (IQR) |             | Mean (SD)                       |             |
| <b>Age</b>                                    | Years                    | 38.0 (21)    | 40.5 (12.2) | 38.0 (22)                       | 40.5 (12.8) |
| <b>Likely re-exposed <sup>a</sup></b>         | 1 (low/no) to 9 (high)   | 3 (4)        | 3.6 (2.8)   |                                 |             |

\*Responded to the survey but did not go for a blood draw to receive serology testing within the 4-month study period

\*\* Those who did not respond to the invitation to participate in the follow-up

PCR = reverse transcription polymerase chain reaction; ED = Emergency Department; ICU = Intensive Care Unit; SD = standard deviation; N = sample count; n = sub-sample count; % = column percent for that group; IQR = Interquartile range

<sup>a</sup> “Do you believe you may have been exposed again to COVID-19?” (1-9; 1=no; 9=yes definitely; 7-9=high suspicion of re-exposure): <sup>aa</sup> “If so, did you feel ill?” (Yes/No); <sup>b</sup> “In the past month, have you traveled outside of the NY metropolitan region and northeast?” (Yes/No); <sup>c</sup> “Do you usually take public transportation to work?” (Yes/No)
